# Supplementary material for: Robust and highly efficient hiPSC generation from patient non-mobilized peripheral blood-derived CD34+ cells using the auto-erasable Sendai virus vector
Source: PubMed Central journal article supplement (PMC6591940; doi:10.1186/s13287-019-1273-2), 2019-06-24
Supplement: 13287_2019_1273_MOESM6_ESM.pdf [file 13287_2019_1273_MOESM6_ESM.pdf]

## Figure S4

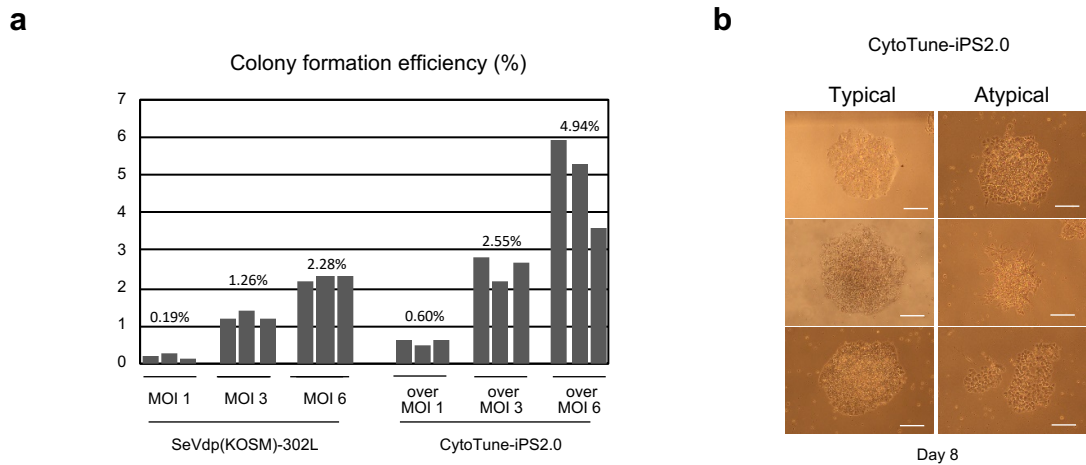

**Figure S4** Comparison of CytoTune<sup>®</sup>-iPS2.0 with SeVdp(KOSM)-302L in the same hiPSC generation protocol.

**a.** Colony formation efficiency per seeded cells (7 days post seeding). The TkPP2 healthy donor CD34<sup>+</sup>-selected cells were infected by SeVdp(KOSM)-302L and CytoTune<sup>®</sup>-iPS2.0 at the indicated MOI. Because the CytoTune<sup>®</sup> kit provides only the titer with the minimum value (*i.e.*, > 5 x 10<sup>6</sup> CIU / 100  $\mu$ l), “over MOI” is used for description. Each bar represents the efficiency assessed in individual well. The mean efficiency values are shown (n = 3).

**b.** The appearance of primary colonies in CytoTune<sup>®</sup>-iPS2.0-based reprogramming. Most of the colonies showed a typical monolayer iPSC-like morphology (Typical), whereas some (~20%) emerged with an atypical appearance with certain heterogeneity (Atypical). Scale bars represent 200  $\mu$ m.
